# Supplementary material
Source: ML conference proceedings conference paper supplement (https://openreview.net/forum?id=CkozFajtKq)

# LiFlow for amorphous structures: initial experiment

## ■ Amorphous LPS simulation settings

- 250 ps trajectory from [Jun et al., 2024], amorphous  $\text{Li}_3\text{PS}_4$  @ 800 K,  $1.8 \text{ g/cm}^3$  (128 atoms); first 50 ps for training
- Propagator scales 10.0 (Li), 2.5 (frame), Corrector noise scale 0.2
- Slower convergence of Propagator when the system is amorphous  $\rightarrow$  Propagator trained for 200k steps

## ■ Observations

- Dynamics: Slightly lower diffusivity (AIMD  $4.33 \times 10^{-5} \text{ cm}^2/\text{s}$  vs. LiFlow  $3.88 \times 10^{-5} \text{ cm}^2/\text{s}$ )
- Static features: RDFs are well reproduced overall, with less structured long-range Li-Li and Li-P interactions

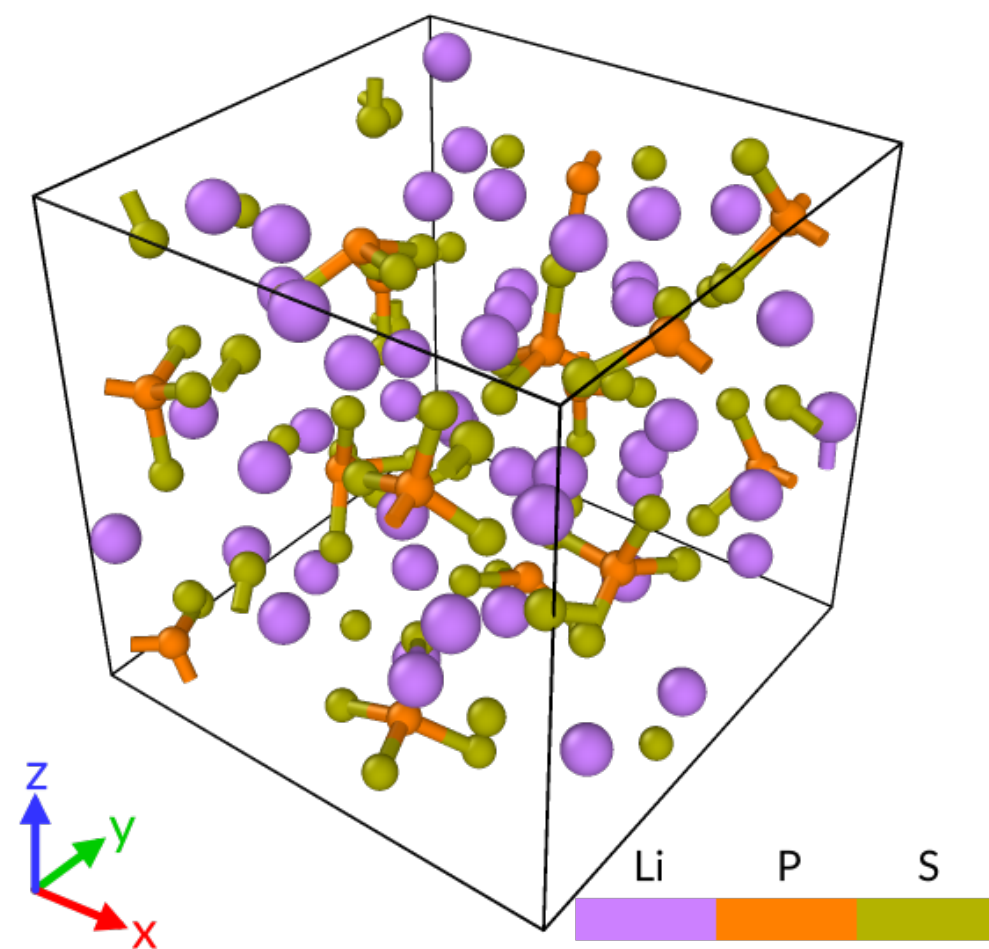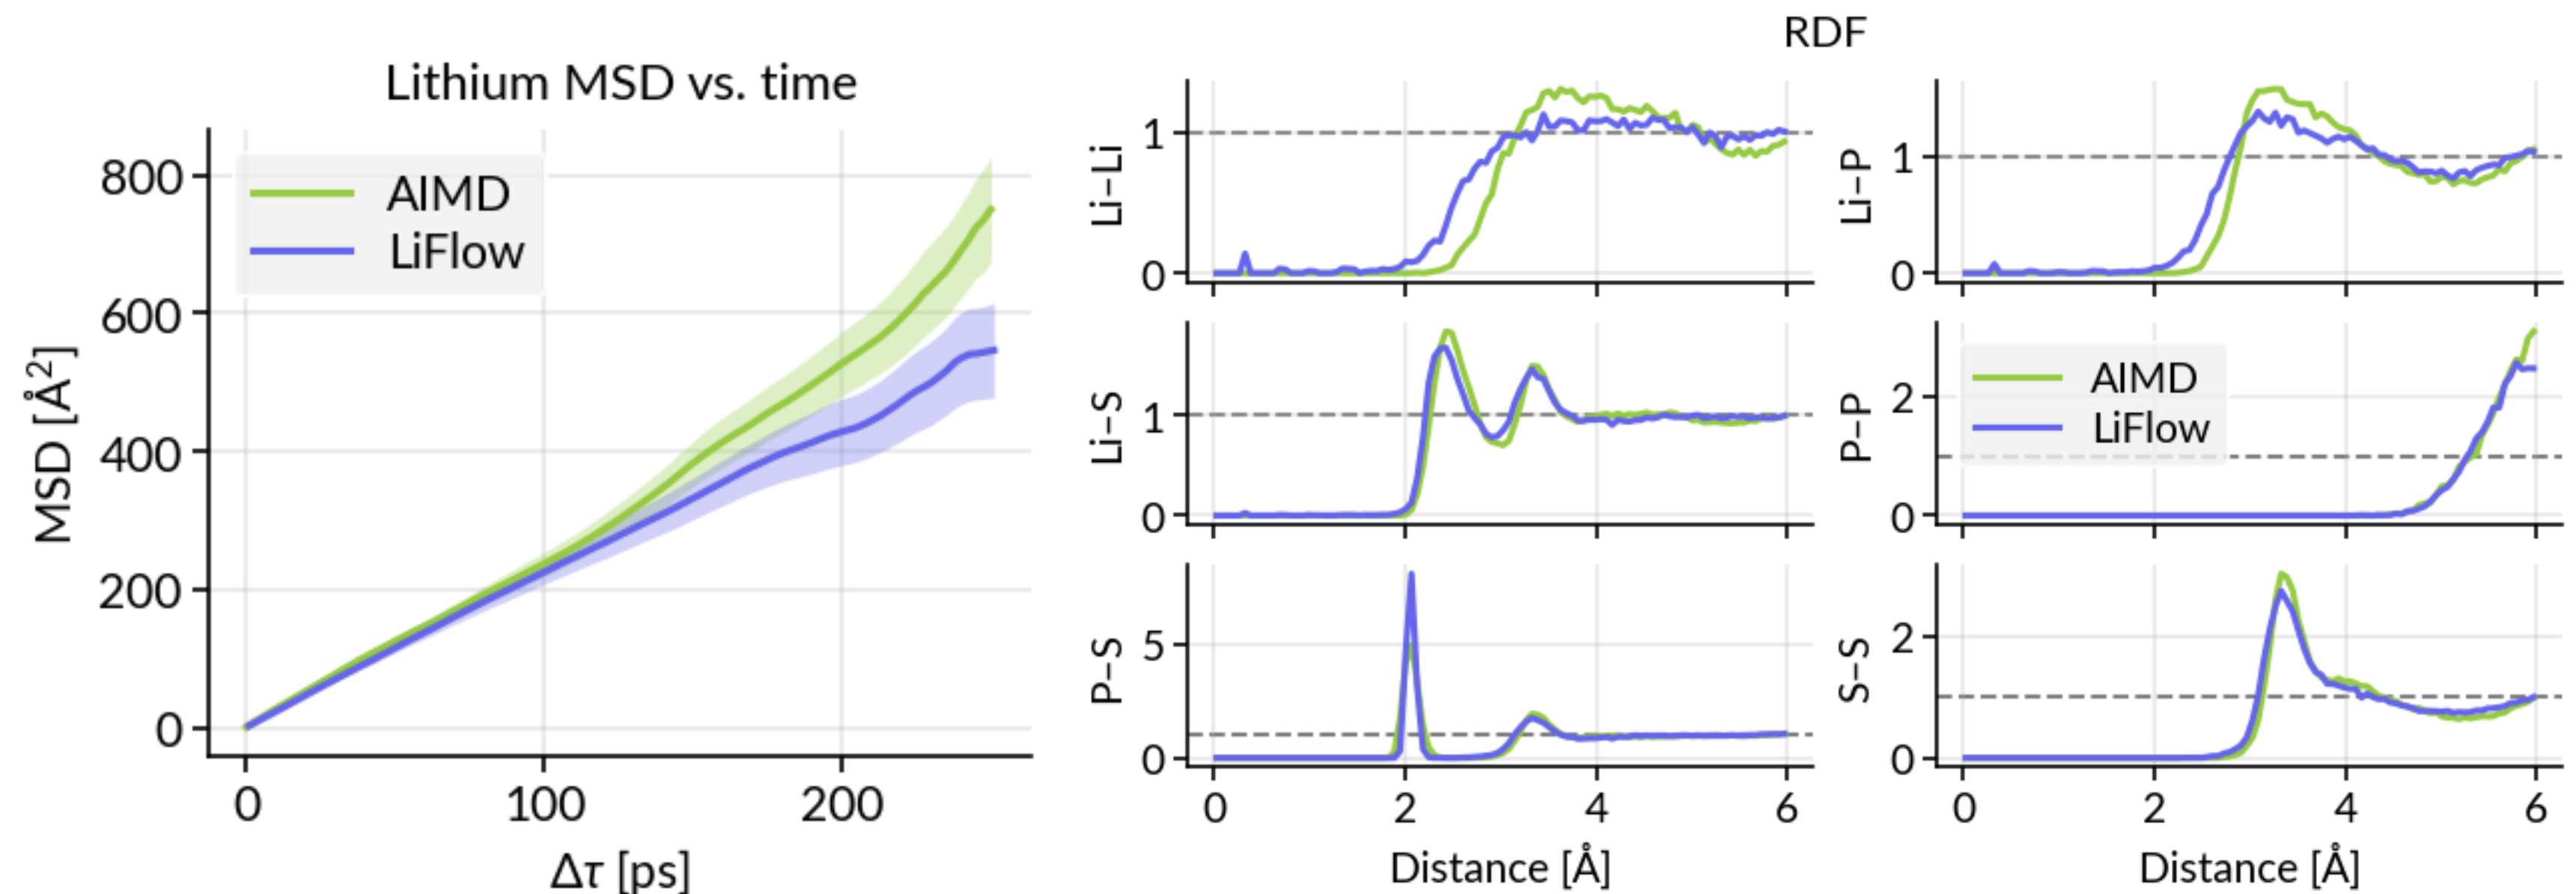

Supplement: supplementary_material [file attachment]
